# Supplementary material
Source: PubMed Central journal article supplement (PMC6643865)
Supplement: ao7b01130_si_001.pdf [file ao7b01130_si_001.pdf]

# **Toxicant Formation in Dabbing: The Terpene Story**

## **Supporting Information**

Jiries Meehan-Atrash, Wentai Luo and Robert M. Strongin\*

Department of Chemistry, Portland State University, 1719 SW 10<sup>th</sup> Avenue, Portland, Oregon, 97201 USA.

### **Table of Contents**

|                                                                   |                  |
|-------------------------------------------------------------------|------------------|
| <b>Experimental Setups</b>                                        | <b>S2</b>        |
| <b>ATD-GC-MS Conditions</b>                                       | <b>S3</b>        |
| <b>Temperature Measurements</b>                                   | <b>S3 - S6</b>   |
| <b>NMR Conditions</b>                                             | <b>S6</b>        |
| <b>Toxicant Levels Generated in Myrcene NMR Experiments</b>       | <b>S7</b>        |
| <b>Products Tentatively Identified in ATD-GC-MS</b>               | <b>S8</b>        |
| <b>Product Identification by Spiking</b>                          | <b>S9 - S13</b>  |
| <b>Sample Chromatograms and Mass Spectra of Select Degradants</b> | <b>S14 - S23</b> |

## Experimental Setups

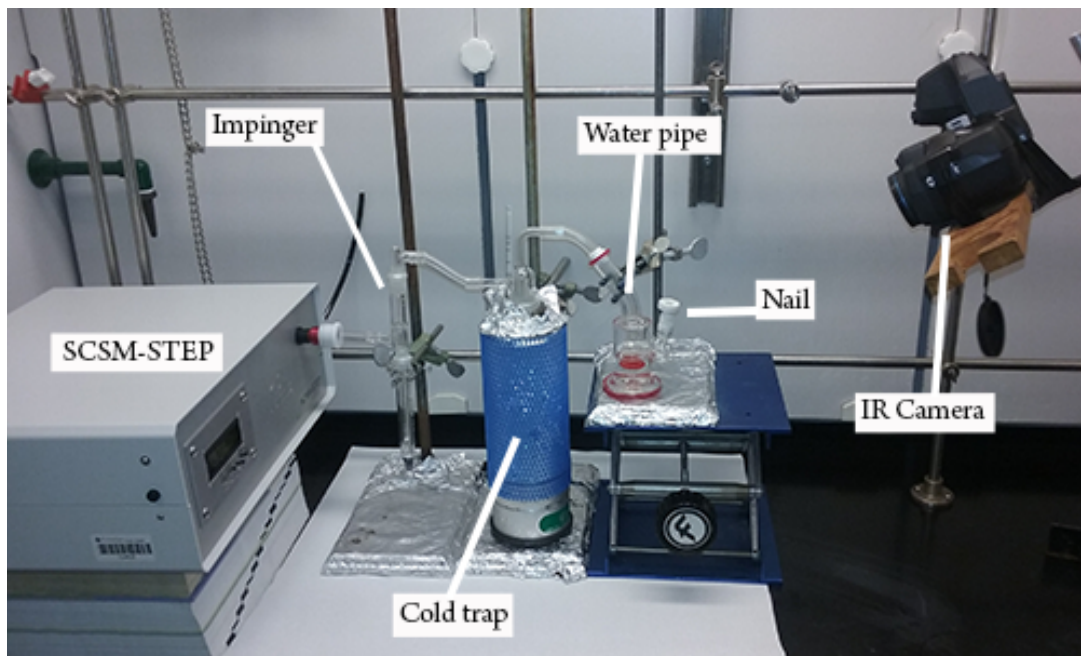

*Figure S1:* The experimental setup used in all NMR experiments. Conditions were exactly replicated in all experiments, using the same height in the lab jack, camera and SCSM. Tubing between the water pipe, cold trap, impinger and SCSM was the same length every experiment. Photograph courtesy of J.M.A. Copyright 2017.

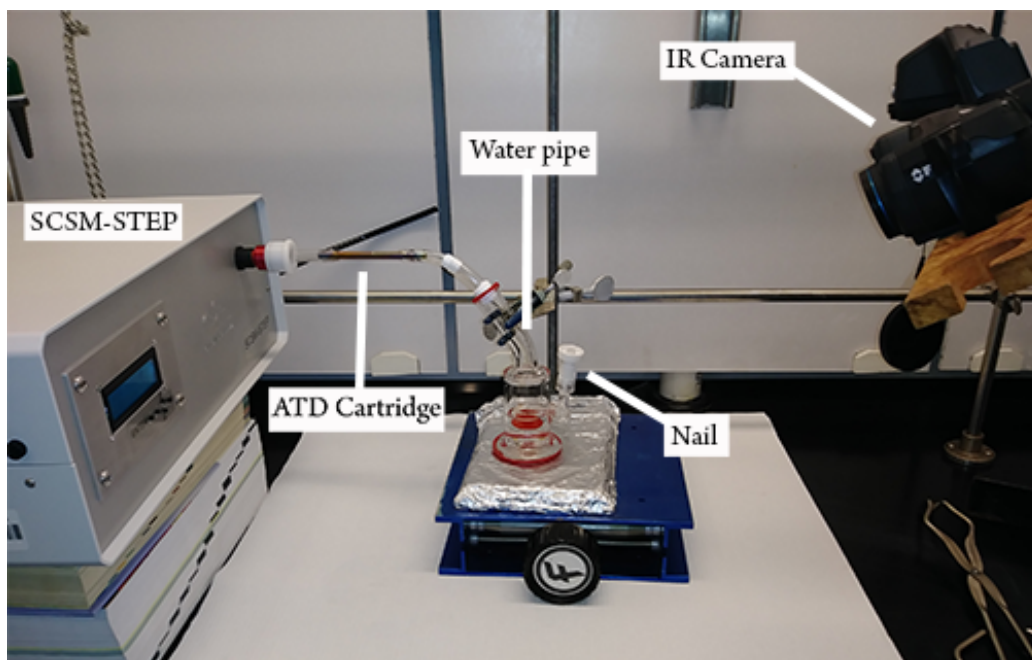

*Figure S2:* Experimental setup used in ATD cartridge sample collection. Photograph courtesy of J.M.A. Copyright 2017.

## ATD-GC-MS Conditions

A sample of one 338 mL in 10s draw was collected onto an adsorption/thermal desorption (ATD) cartridge as showing in Figure S2. The ATD cartridge contains 100 mg of 35/60 mesh Tenax TA and 200 mg of 60/80 mesh Carbograph 1 TD (Camsco Inc., Houston, TX). Each ATD sample cartridge was thermally desorbed using a TurboMatrix 650 ATD unit (PerkinElmer, Waltham, MA). Each cartridge was automatically added with 20 ng of fluorobenzene, 18.6 ng of toluene-d8, 21.7 ng of 4-bromofluorobenzene, and 20.3 ng of 1,2-dichlorobenzene-d4 as the internal standards. The ATD unit thermally desorbed each ATD cartridge for 10 min at 285 °C with a He desorption flow of 40 mL/min and split flow of 10 mL/min, the desorption stream was trapped at -10 °C on an intermediate “Tenax® trap”. Thermal desorption of the intermediate trap occurred at 295 °C and 25 psi constant pressure He, on a split flow of 12 mL/min for 4 min. Through a 1 m long and 0.25 mm i.d. deactivated fused silica transfer line (235 °C), the un-split portion of the stream was passed on to a 30 m length, 0.25 mm i.d., and 1.4 µm film thickness Rxi-624Sil MS (Restek Inc., Bellefonte, PA) capillary GC column mounted in an Agilent (Santa Clara, CA) 7890A GC. This was interfaced to an Agilent 5975C MS operated in electron impact ionization mode. The GC oven temperature was hold at 40 °C for 2 min, programing to 100 °C at 10 °C /min, then programing to 280 °C at 12 °C/min , and then at 15 °C/min to 220 °C. The MS scan range was 34 to 300 amu. The electron multiplier voltage was 1525 V.

## Temperature Measurements

Limonene, linalool and Fire OG terpenes were only tested once each at the highest TR chosen for the NMR experiments. Temperatures used in each of these experiments are shown in Table S1.

|          | Limonene       |                | Linalool       |                | Fire OG        |                |
|----------|----------------|----------------|----------------|----------------|----------------|----------------|
|          | T <sub>i</sub> | T <sub>f</sub> | T <sub>i</sub> | T <sub>f</sub> | T <sub>i</sub> | T <sub>f</sub> |
| Hit 1    | 549            | 498            | 558            | 503            | 565            | 510            |
| Hit 2    | 550            | 503            | 557            | 500            | 556            | 500            |
| Hit 3    | 550            | 500            | 552            | 502            | 552            | 501            |
| Hit 4    | 547            | 502            | 556            | 501            | 559            | 500            |
| Hit 5    | 549            | 500            | 556            | 506            | 555            | 503            |
| Average  | 549            | 501            | 556            | 502            | 557            | 503            |
| St. Dev. | 1.22           | 1.95           | 2.28           | 2.30           | 4.93           | 4.21           |

Table S1: Temperatures in °C used for each individual hit, shown with their averages and standard deviations.

The myrcene study consisted of dabbing it at four different TRs to capture the full array of temperatures used by those that practice dabbing.

Myrcene experiments for each TR were done in triplicate. The five  $T_i$  and  $T_f$  for each dab taken in each experiment were averaged. Data for all temperatures used are shown in Tables S3 through S6. The average of the standard deviations of each  $T_i$  and  $T_f$  for all 12 experiments is 2.4 °C, indicating the experiments were done consistently. The average of the  $T_i$  and  $T_f$  of the four TR replicates was taken and a median temperature ( $T_m$ ) was calculated. Table S2 shows the total average  $T_i$  and  $T_f$  for each TR. M1- M12 are the abbreviations used for each individual myrcene experiment (four TRs x three replicates).

| $T_m$ | $T_i$     | $T_f$     |
|-------|-----------|-----------|
| 526   | 551 ± 0.8 | 500 ± 2.4 |
| 455   | 477 ± 0.1 | 434 ± 0.8 |
| 403   | 421 ± 0.2 | 386 ± 0.8 |
| 322   | 336 ± 1.4 | 309 ± 2.7 |

Table S2:  $T_m$ ,  $T_i$ , and  $T_f$  values for each TR in °C.

|          | $T_m = 526\text{ °C}$ |       |       |       |       |       |
|----------|-----------------------|-------|-------|-------|-------|-------|
|          | M1                    |       | M2    |       | M3    |       |
|          | $T_i$                 | $T_f$ | $T_i$ | $T_f$ | $T_i$ | $T_f$ |
| Hit 1    | 552                   | 500   | 550   | 501   | 555   | 496   |
| Hit 2    | 549                   | 500   | 555   | 503   | 550   | 498   |
| Hit 3    | 550                   | 507   | 550   | 495   | 554   | 500   |
| Hit 4    | 551                   | 504   | 552   | 499   | 552   | 501   |
| Hit 5    | 552                   | 503   | 550   | 494   | 551   | 499   |
| Average  | 551                   | 503   | 551   | 498   | 552   | 499   |
| St. Dev. | 1.30                  | 2.95  | 2.19  | 3.85  | 2.07  | 1.92  |

Table S3: Temperature values used for each myrcene hit at  $T_m = 526\text{ °C}$ . The average  $T_i$  and  $T_f$  values for M1, M2 and M3 were themselves averaged to get the total average  $T_i$  and  $T_f$  for the  $T_m = 526\text{ °C}$  TR, shown in Table S2.

|          | $T_m = 455\text{ }^\circ\text{C}$ |       |       |       |       |       |
|----------|-----------------------------------|-------|-------|-------|-------|-------|
|          | M4                                |       | M5    |       | M6    |       |
|          | $T_i$                             | $T_f$ | $T_i$ | $T_f$ | $T_i$ | $T_f$ |
| Hit 1    | 477                               | 436   | 477   | 434   | 476   | 430   |
| Hit 2    | 476                               | 432   | 476   | 432   | 476   | 432   |
| Hit 3    | 475                               | 433   | 477   | 436   | 478   | 434   |
| Hit 4    | 478                               | 437   | 476   | 434   | 475   | 434   |
| Hit 5    | 477                               | 434   | 478   | 439   | 478   | 437   |
| Average  | 477                               | 434   | 477   | 435   | 477   | 433   |
| St. Dev. | 1.14                              | 2.07  | 0.84  | 2.65  | 1.34  | 2.61  |

*Table S4:* Temperature values used for each myrcene hit at  $T_m = 455\text{ }^\circ\text{C}$ . The average  $T_i$  and  $T_f$  values for M4, M5 and M6 were themselves averaged to get the total average  $T_i$  and  $T_f$  for the  $T_m = 455\text{ }^\circ\text{C}$  TR, shown in Table S2.

|          | $T_m = 405\text{ }^\circ\text{C}$ |       |       |       |       |       |
|----------|-----------------------------------|-------|-------|-------|-------|-------|
|          | M7                                |       | M8    |       | M9    |       |
|          | $T_i$                             | $T_f$ | $T_i$ | $T_f$ | $T_i$ | $T_f$ |
| Hit 1    | 420                               | 385   | 421   | 384   | 420   | 383   |
| Hit 2    | 421                               | 388   | 420   | 387   | 422   | 386   |
| Hit 3    | 422                               | 388   | 420   | 385   | 420   | 383   |
| Hit 4    | 419                               | 386   | 420   | 384   | 421   | 387   |
| Hit 5    | 423                               | 386   | 422   | 387   | 421   | 386   |
| Average  | 421                               | 387   | 421   | 385   | 421   | 385   |
| St. Dev. | 1.58                              | 1.34  | 0.89  | 1.52  | 0.84  | 1.87  |

*Table S5:* Temperature values used for each myrcene hit at  $T_m = 405\text{ }^\circ\text{C}$ . The average  $T_i$  and  $T_f$  values for M7, M8 and M9 were themselves averaged to get the total average  $T_i$  and  $T_f$  for the  $T_m = 405\text{ }^\circ\text{C}$  TR, shown in Table S2.

|          | $T_m = 322\text{ }^\circ\text{C}$ |       |       |       |       |       |
|----------|-----------------------------------|-------|-------|-------|-------|-------|
|          | M10                               |       | M11   |       | M12   |       |
|          | $T_i$                             | $T_f$ | $T_i$ | $T_f$ | $T_i$ | $T_f$ |
| Hit 1    | 337                               | 311   | 335   | 307   | 335   | 308   |
| Hit 2    | 336                               | 309   | 336   | 309   | 334   | 306   |
| Hit 3    | 326                               | 291   | 344   | 319   | 337   | 311   |
| Hit 4    | 337                               | 310   | 336   | 311   | 337   | 308   |
| Hit 5    | 337                               | 309   | 336   | 311   | 338   | 309   |
| Average  | 335                               | 306   | 337   | 311   | 336   | 308   |
| St. Dev. | 4.83                              | 8.43  | 3.71  | 4.56  | 1.64  | 1.82  |

*Table S6:* Temperature values used for each myrcene hit at  $T_m = 322\text{ }^\circ\text{C}$ . The average  $T_i$  and  $T_f$  values for M7, M8 and M9 were themselves averaged to get the total average  $T_i$  and  $T_f$  for the  $T_m = 322\text{ }^\circ\text{C}$  TR, shown in Table S2.

## NMR Conditions

All myrcene samples were run at 1024 scans, 6.7 second repetition rate, 30-degree flip angle with 64 k data point acquisition on a Bruker Avance III 600 MHz NMR spectrometer. Spectra were processed with 0.3 Hz of line broadening with a final data size of 64 k real data points. Five OG terpenes, limonene and linalool were run under the same conditions but with 256 scans. Analyte assignments of benzene and methacrolein were performed by spiking of authentic standards. Integral measurements for quantitative-NMR were done using Global Spectral Deconvolution (GSD) from MestreLab software.

## Toxicant Levels Generated in Myrcene NMR Experiments

| Levels by Experiment |            |              |                   |
|----------------------|------------|--------------|-------------------|
| T <sub>m</sub> (°C)  | Experiment | Benzene (ng) | Methacrolein (ng) |
| 526                  | M1         | 432          | 4569              |
|                      | M2         | 362          | 4279              |
|                      | M3         | 457          | 4804              |
| 455                  | M4         | <i>ND</i>    | 2470              |
|                      | M5         | <i>ND</i>    | 2392              |
|                      | M6         | <i>ND</i>    | 2397              |
| 403                  | M7         | <i>ND</i>    | 1405              |
|                      | M8         | <i>ND</i>    | 979               |
|                      | M9         | <i>ND</i>    | 1340              |
| 322                  | M10        | <i>ND</i>    | <i>ND</i>         |
|                      | M11        | <i>ND</i>    | <i>ND</i>         |
|                      | M12        | <i>ND</i>    | <i>ND</i>         |

*Table S7:* Benzene and methacrolein levels determined in the NMR tube for each experiment.

Table S7 shows the initial data used for calculations. Averages of each triplicate value were taken, standard deviation calculated, and confidence interval found at 95 % confidence level.

The amount of toxicant generated per mg of myrcene administered in the dab (75  $\mu$ L) was calculated from the values in Table S8, using the density of myrcene. The amount of toxicant generated per mg of limonene, linalool and Fire OG were calculated analogously using their density, results of which are shown in Table 1 in the main body of the report.

Knowing that an average mass of a dab is 40 mg, and assuming that all terpenes will degrade to form similar levels of toxicants as myrcene, the amount of toxicant per mg of myrcene formed is multiplied by the mass of terpenes in a 40 mg dab of BHO, 2.36 mg. This mass of toxicant formed per dab is then divided by the volume of the draw (338 mL) to give a concentration of toxicant in the air that would be inhaled.

## Products Identified in ATD-GC-MS Experiment

| Retention time (min) | Product                                                         | Match Quality | CAS Number |
|----------------------|-----------------------------------------------------------------|---------------|------------|
| 1.242                | <b>2-methylpropene</b>                                          | 90            | 115-11-7   |
| 1.297                | 1,3-butadiene                                                   | 91            | 106-99-0   |
| 1.348                | <b>acetaldehyde</b>                                             | 72            | 75-07-0    |
| 1.929                | isoprene                                                        | 95            | 78-79-5    |
| 2.1                  | <b>acetone</b>                                                  | 80            | 67-64-1    |
| 2.3                  | cyclopentadiene                                                 | 97            | 542-92-7   |
| 2.868                | 2-methyl propanal                                               | 83            | 78-84-2    |
| 3.019                | methacrolein                                                    | 94            | 78-85-3    |
| 3.148                | 2,3-dimethyl-2-butene                                           | 90            | 563-79-1   |
| 3.287                | 1,3-hexadiene                                                   | 93            | 592-48-3   |
| 3.439                | methyl vinyl ketone                                             | 80            | 78-94-4    |
| 3.51                 | 3-methyl furan                                                  | 91            | 930-27-8   |
| 3.881                | 2-methyl-1,3-pentadiene                                         | 94            | 1118-58-7  |
| 3.993                | 2-methyl-1,3-cyclopentadiene                                    | 92            | 3727-31-9  |
| 4.481                | 1,3-cyclohexadiene                                              | 93            | 592-57-4   |
| 4.893                | 2-ethylacrolein                                                 | 94            | 922-63-4   |
| 6.406                | 1-methyl-1,4-cyclohexadiene                                     | 94            | 4313-57-9  |
| 6.732                | 1,3,5-cycloheptatriene                                          | 95            | 544-25-2   |
| 14.797               | <b>naphthalene</b>                                              | 95            | 91-20-3    |
| 15.691               | 4-isopropyl benzaldehyde                                        | 93            | 122-03-2   |
| 15.884               | 3,7-dimethyl-2,6-octadienal                                     | 97            | 5392-40-5  |
| 16.123               | 4-isopropenyl-1-cyclohexene-1-carbaldehyde                      | 98            | 2111-75-3  |
| 16.307               | 1-methyl naphthalene                                            | 95            | 90-12-0    |
| 16.549               | 2-methyl naphthalene                                            | 96            | 91-57-6    |
| 22.281               | (E,E)-7,11,15-trimethyl-3-methylene-hexadeca-1,6,10,14-tetraene | 70            | 70901-63-2 |
| 22.511               | (E,E,E)-3,7,11,15-tetramethylhexadeca-1,3,6,10,14-pentaene      | 83            | 77898-97-6 |

Table S8: Products identified in a myrcene dab sample taken at the second highest TR of  $T_m = \text{ca. } 450 \text{ }^\circ\text{C}$  ( $T_i = 470 \text{ }^\circ\text{C}$  and  $T_f = 430 \text{ }^\circ\text{C}$ ) using ATD-GC-MS. Products highlighted in red were also identified in the air blank.



## Product Identification by Spiking

A sample from the highest TR, M1, was spiked with low concentration methacrolein and benzene standards to verify the presence of these in the spectra. All methacrolein peaks were identified (Figures S3- S6), as well as the singular benzene peak (Figure S7). The methacrolein standard was spiked twice to fully verify its existence amongst overlapping peaks.

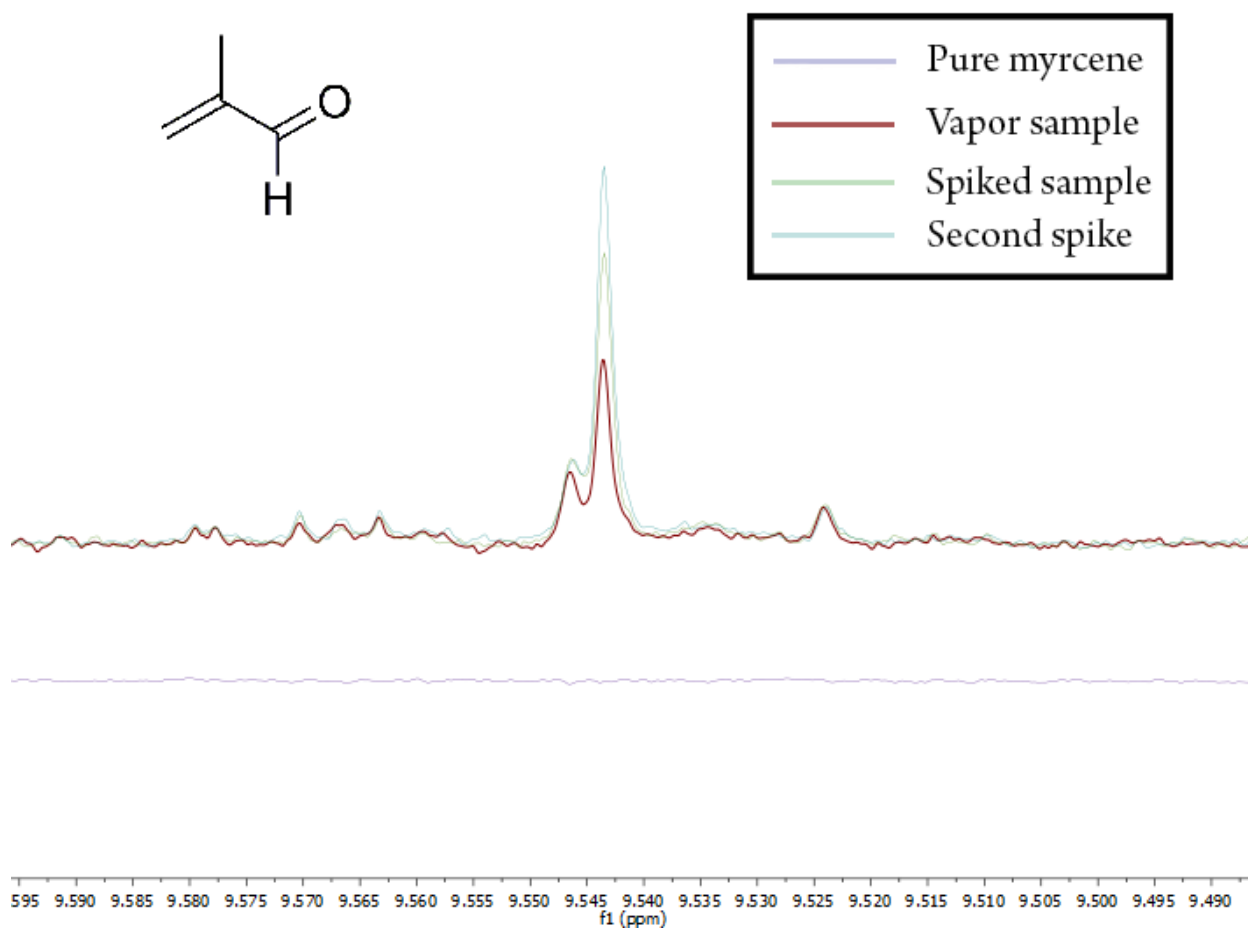

*Figure S3:* Overlay in the aldehyde proton region of methacrolein (9.54 ppm) displaying a pure myrcene sample, a vapor sample, the same vapor sample spiked with pure methacrolein, and a second spike with pure methacrolein showing a rise in intensity of this aldehyde signal.

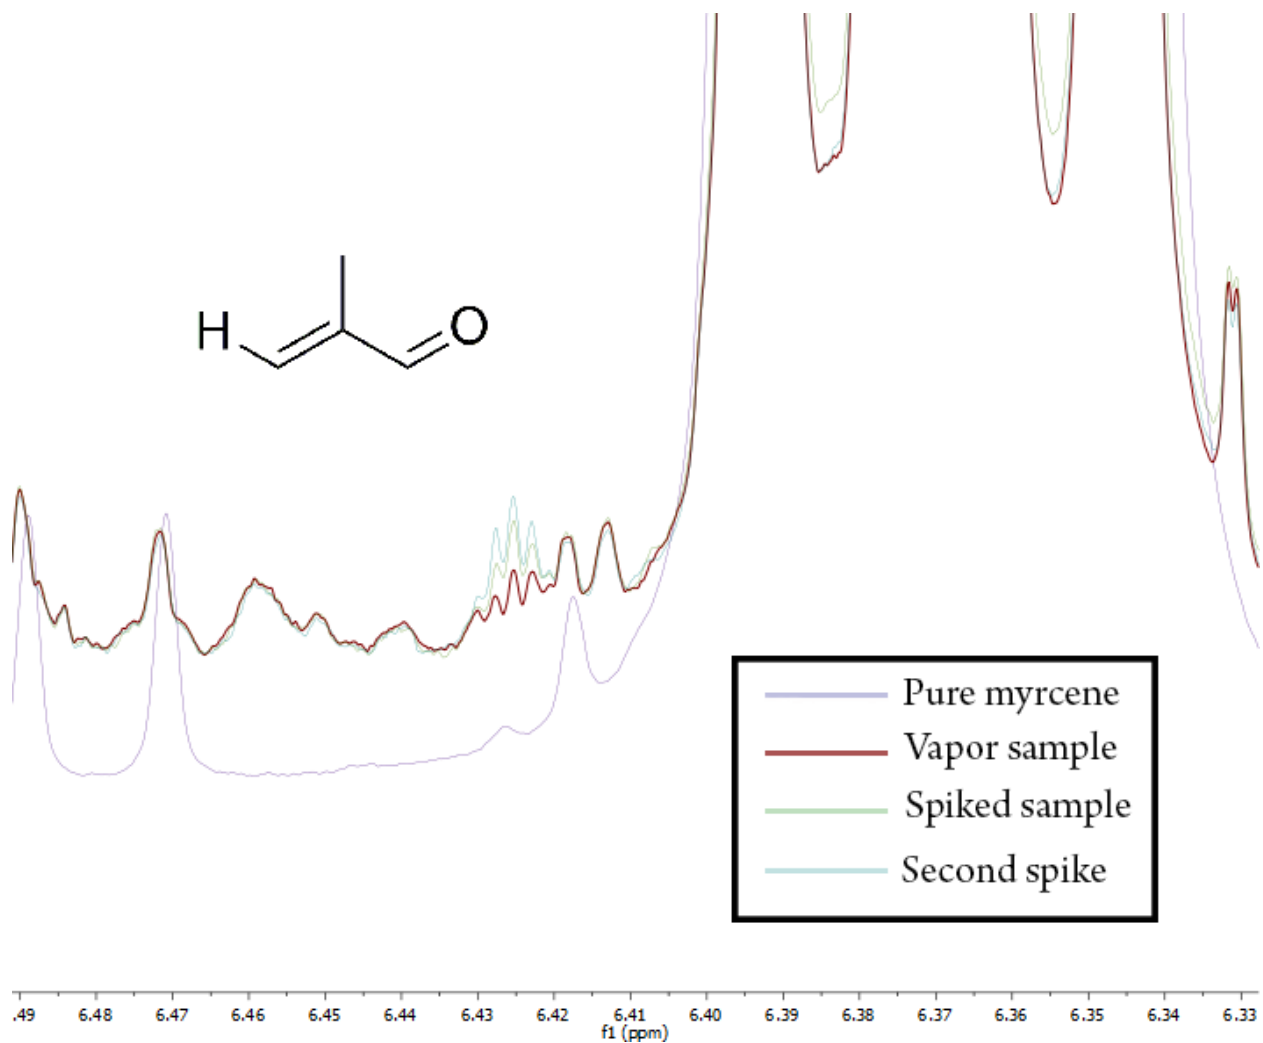

*Figure S4:* Overlay in the alkene proton region of methacrolein (6.43 ppm) displaying a pure myrcene sample, a vapor sample, the same vapor sample spiked with pure methacrolein, and a second spike with pure methacrolein showing a rise in intensity of this alkene signal.

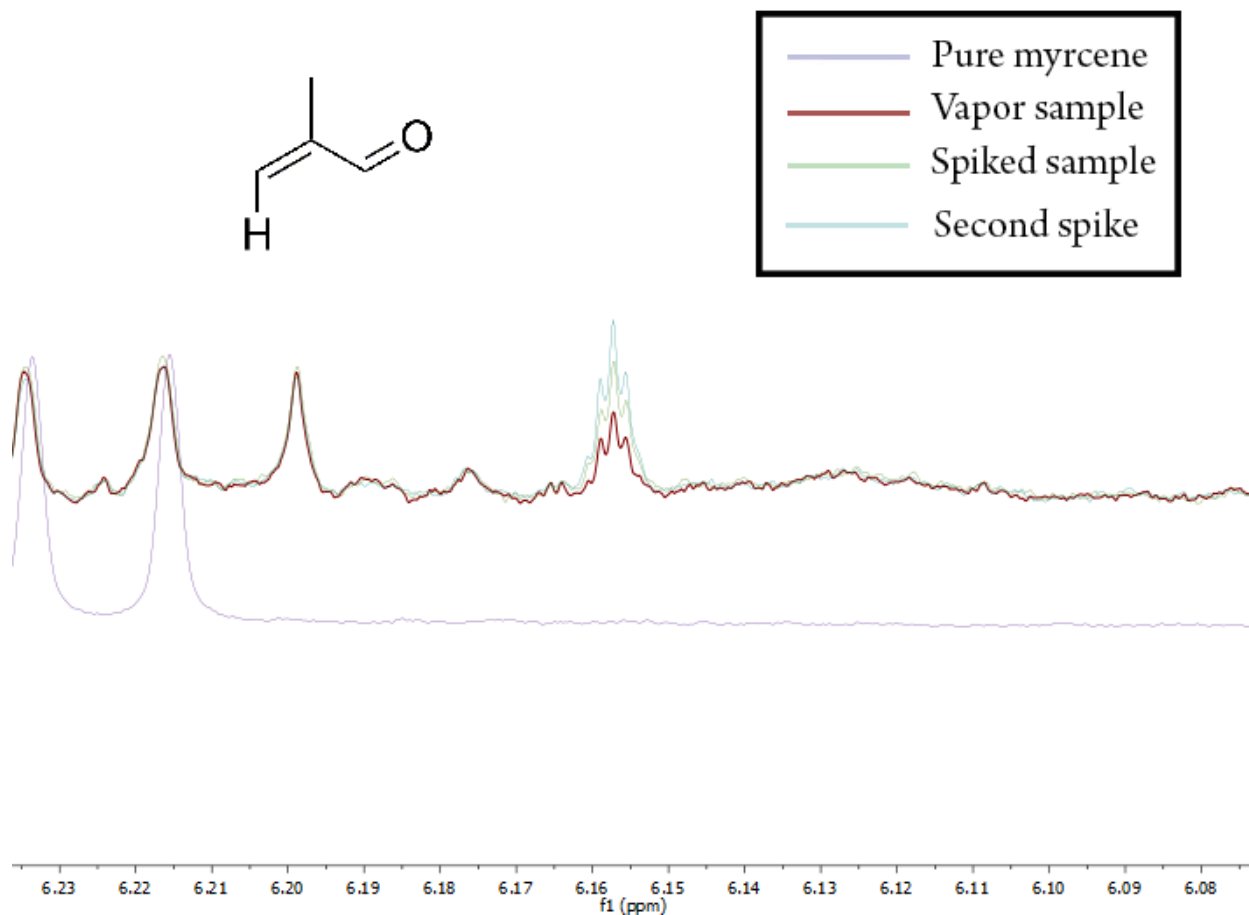

*Figure S5:* Overlay in the alkene proton region of methacrolein (6.16 ppm) displaying a pure myrcene sample, a vapor sample, the same vapor sample spiked with pure methacrolein, and a second spike with pure methacrolein showing a rise in intensity of this alkene signal.

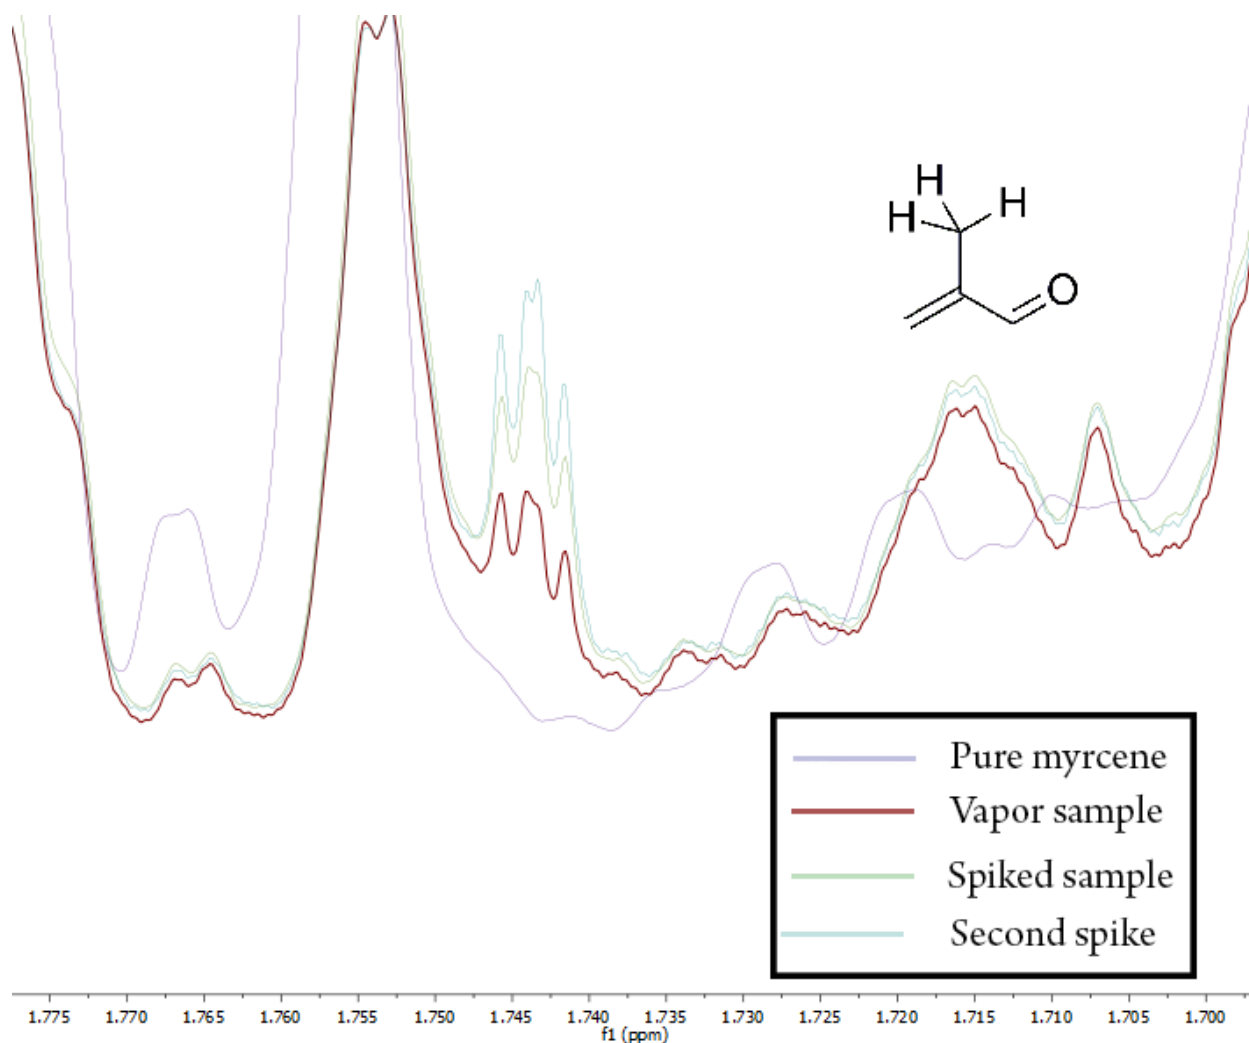

*Figure S6:* Overlay in the methyl proton region of methacrolein (1.74 ppm) displaying a pure myrcene sample, a vapor sample, the same vapor sample spiked with pure methacrolein, and a second spike with pure methacrolein showing a rise in intensity of this methyl signal.

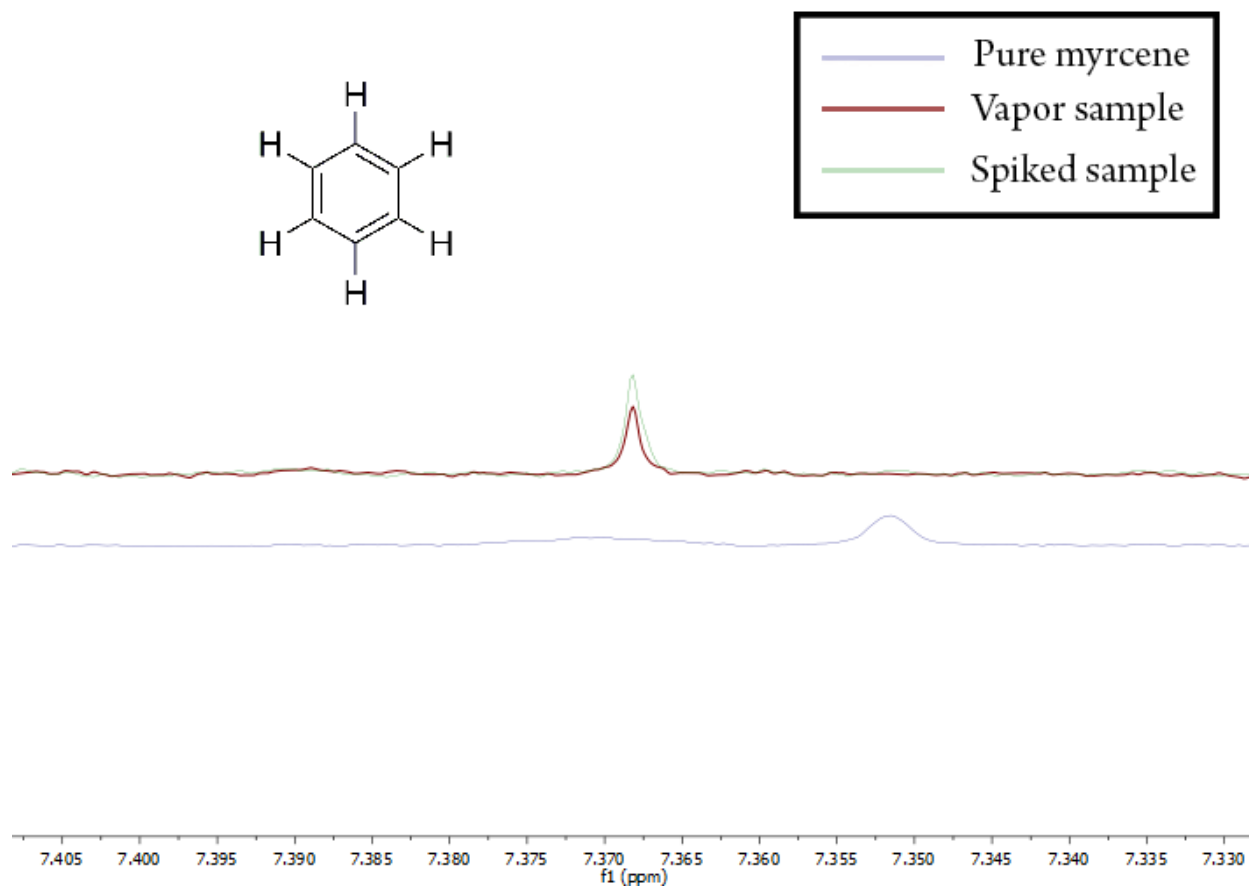

*Figure S7:* Overlay in the benzene proton region (7.37 ppm) displaying a pure myrcene sample, a vapor sample, the same vapor sample spiked with pure benzene showing a rise in intensity of the benzene proton signal.

## Sample Chromatograms and Mass Spectra of Select Degradants

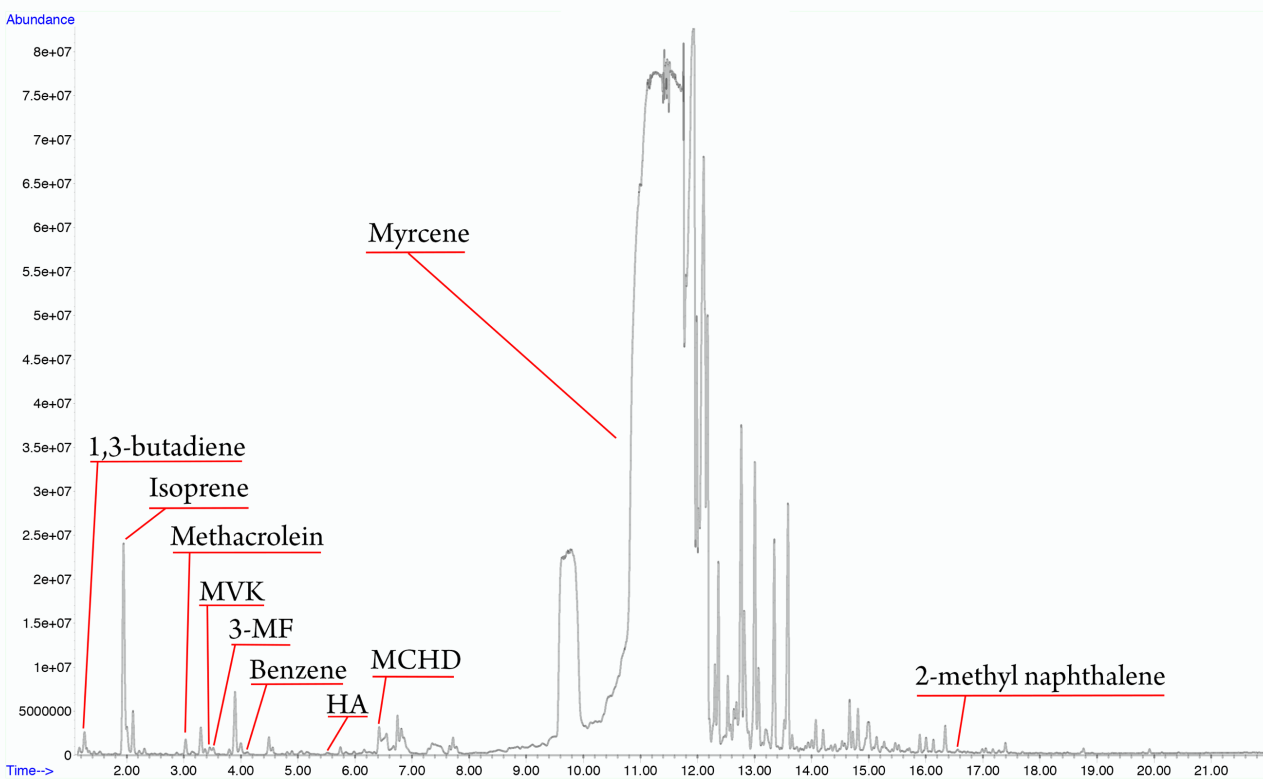

*Figure S8:* A sample chromatogram from a high-temperature myrcene dabbing sample collected using ATD-GC-MS. Highlighted peaks include: 1,3-butadiene, isoprene, methacrolein, methyl vinyl ketone (MVK), 3-methylfuran (3-MF), benzene, hydroxyacetone (HA), 1-methyl-1,4-cyclohexadiene (MCHD), myrcene, and 2-methylnaphthalene.

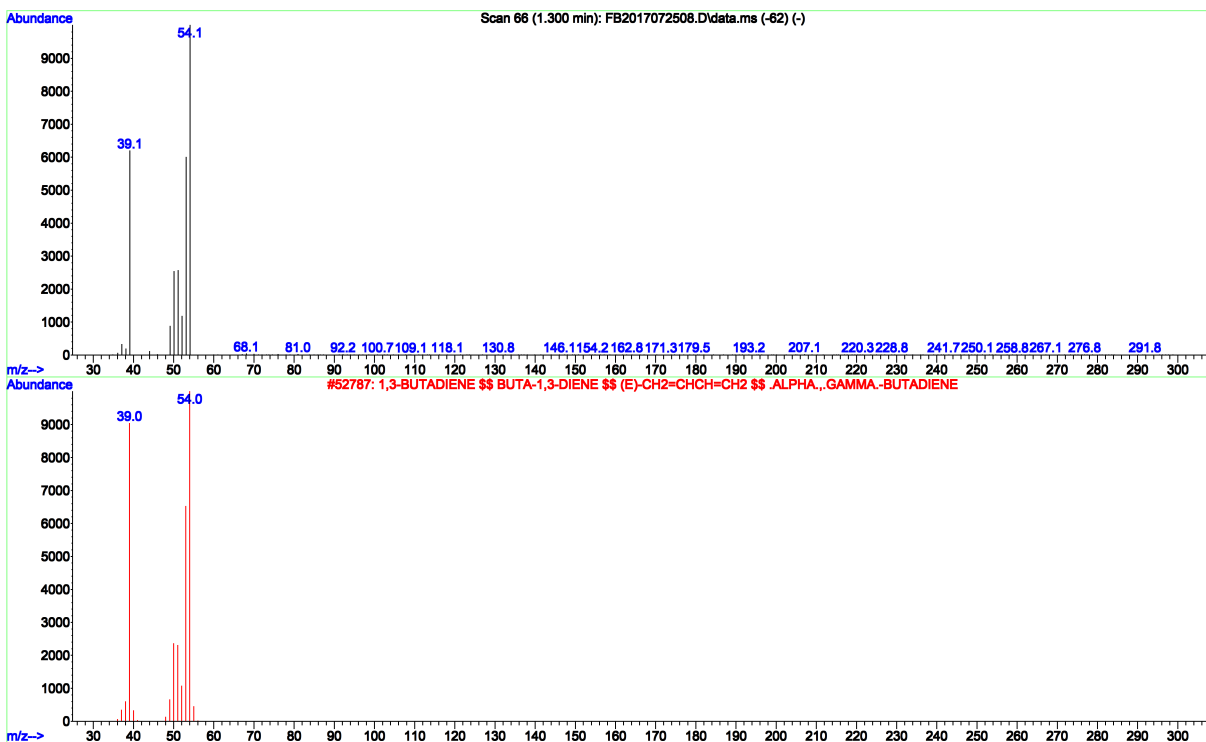

Figure S9: Mass spectrum of 1,3-butadiene (top, grey) compared to NIST library mass spectrum (bottom, red).

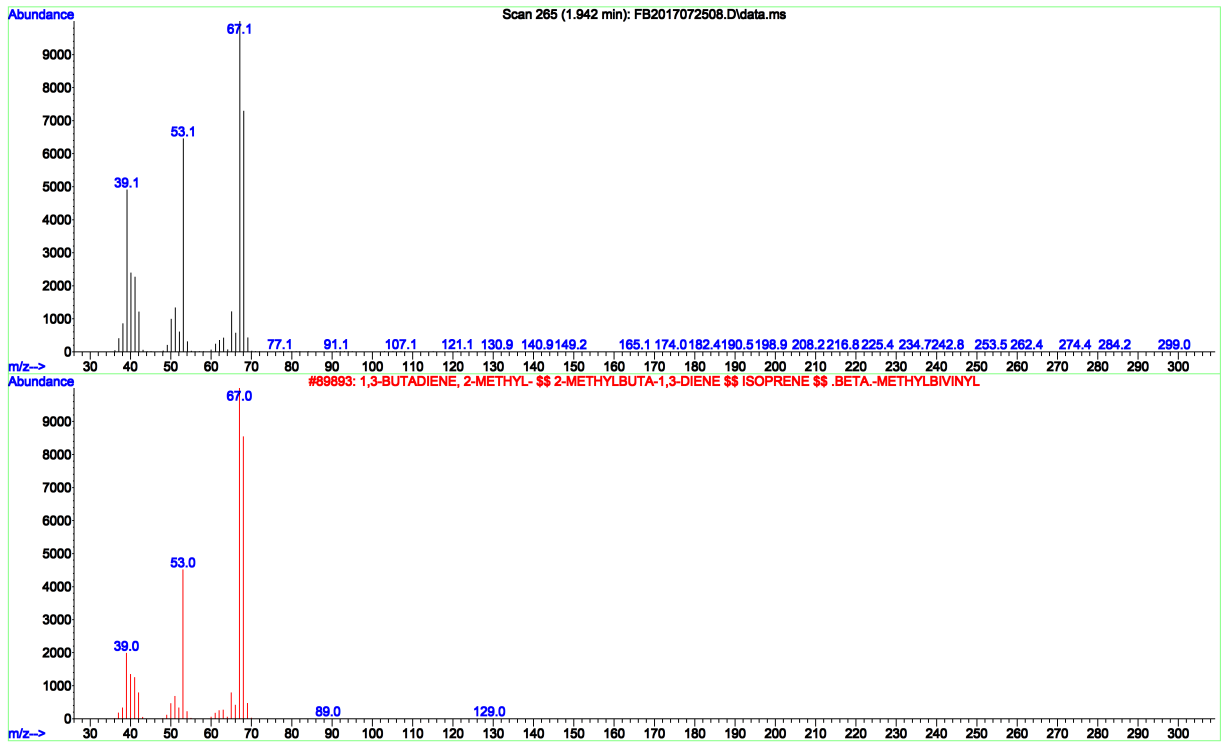

Figure S10: Mass spectrum of isoprene (top, grey) compared to NIST library mass spectrum (bottom, red).



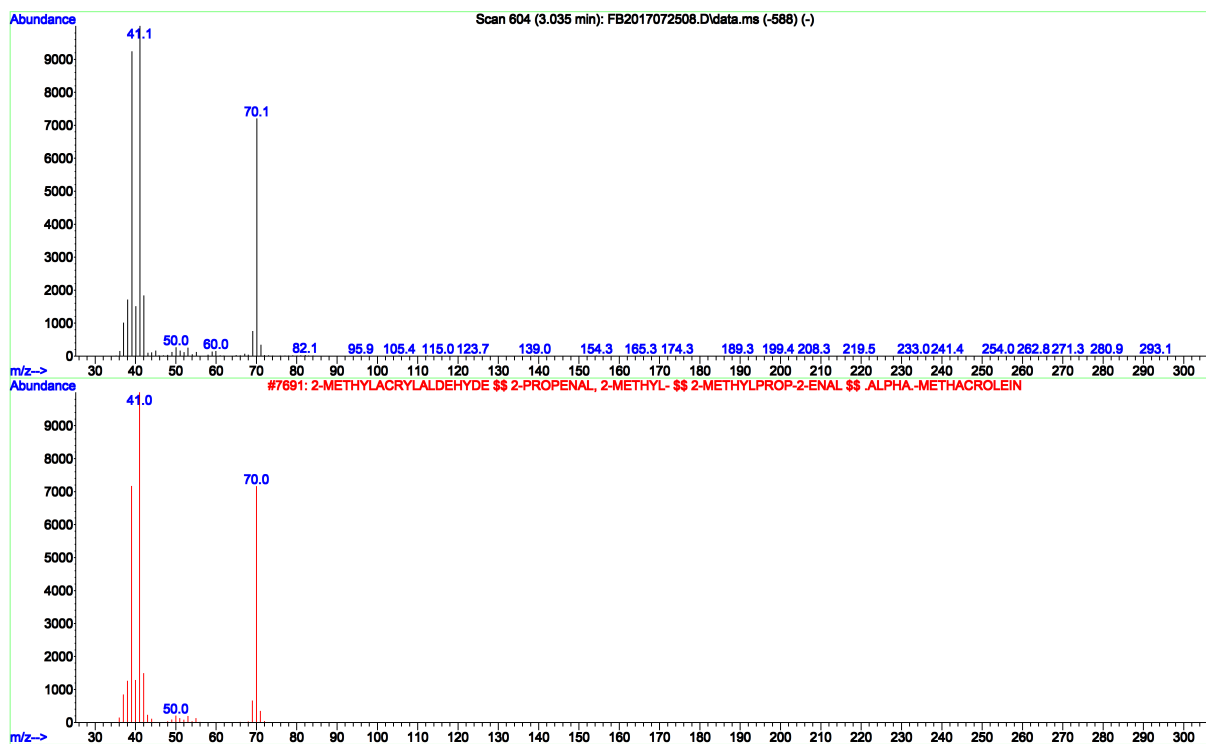

Figure S11: Mass spectrum of methacrolein (top, grey) compared to NIST library mass spectrum (bottom, red).

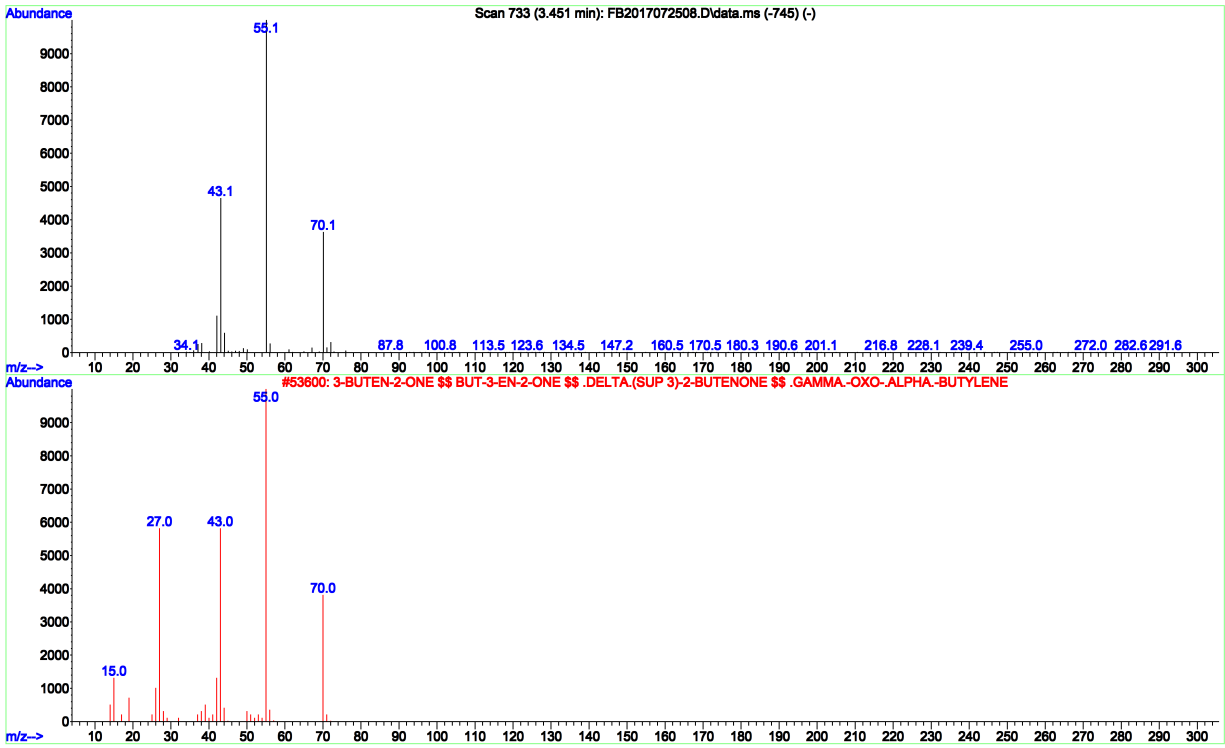

Figure S12: Mass spectrum of methyl vinyl ketone (top, grey) compared to NIST library mass spectrum (bottom, red).

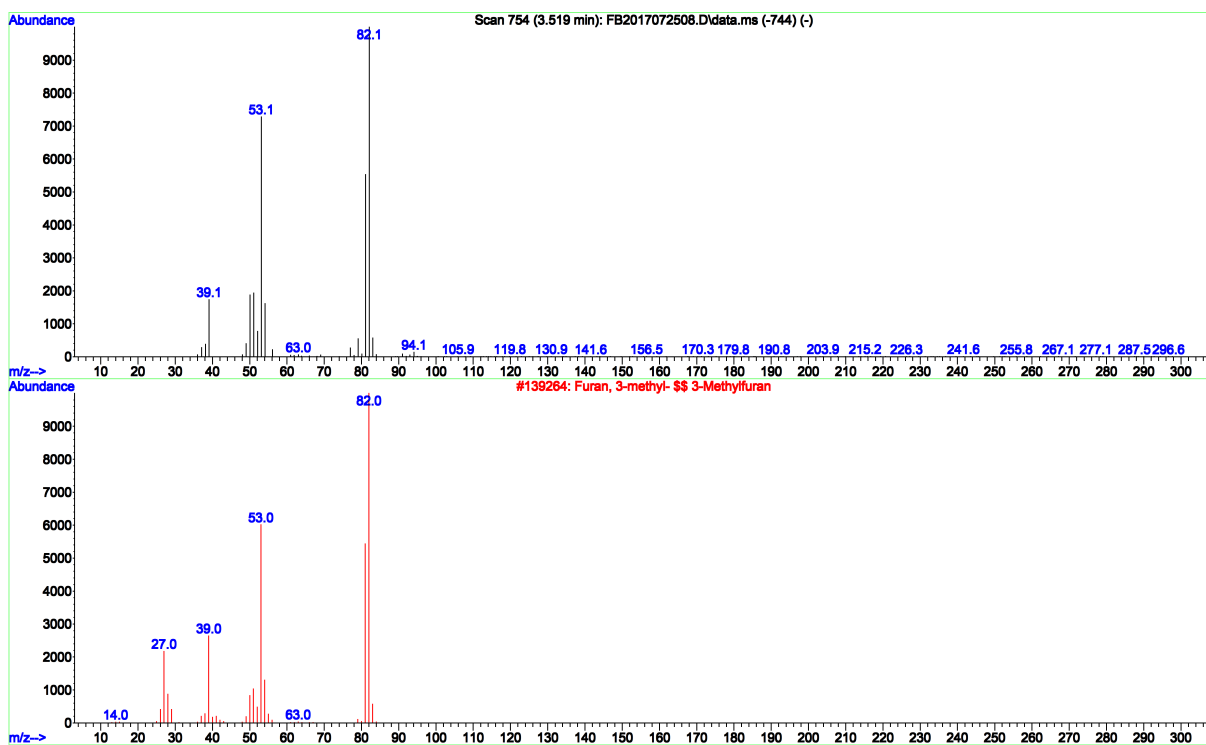

Figure S13: Mass spectrum of 3-methyl furan (top, grey) compared to NIST library mass spectrum (bottom, red).

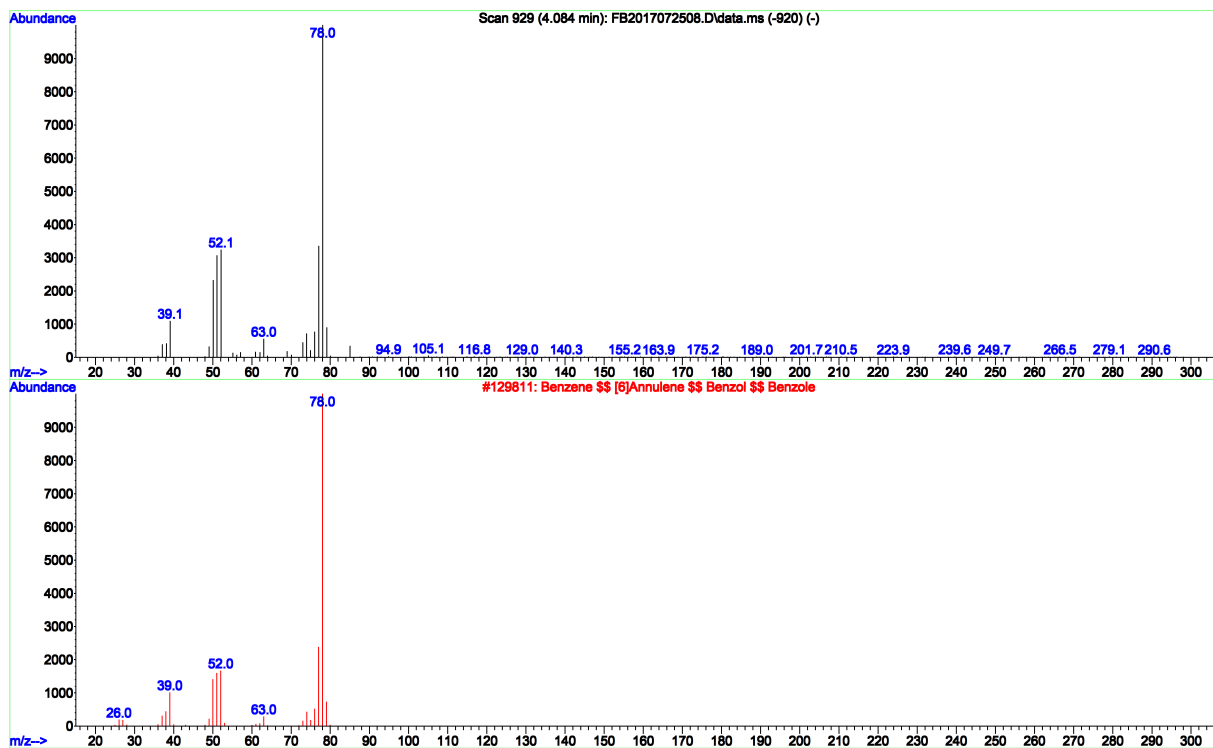

Figure S14: Mass spectrum of benzene (top, grey) compared to NIST library mass spectrum (bottom, red).

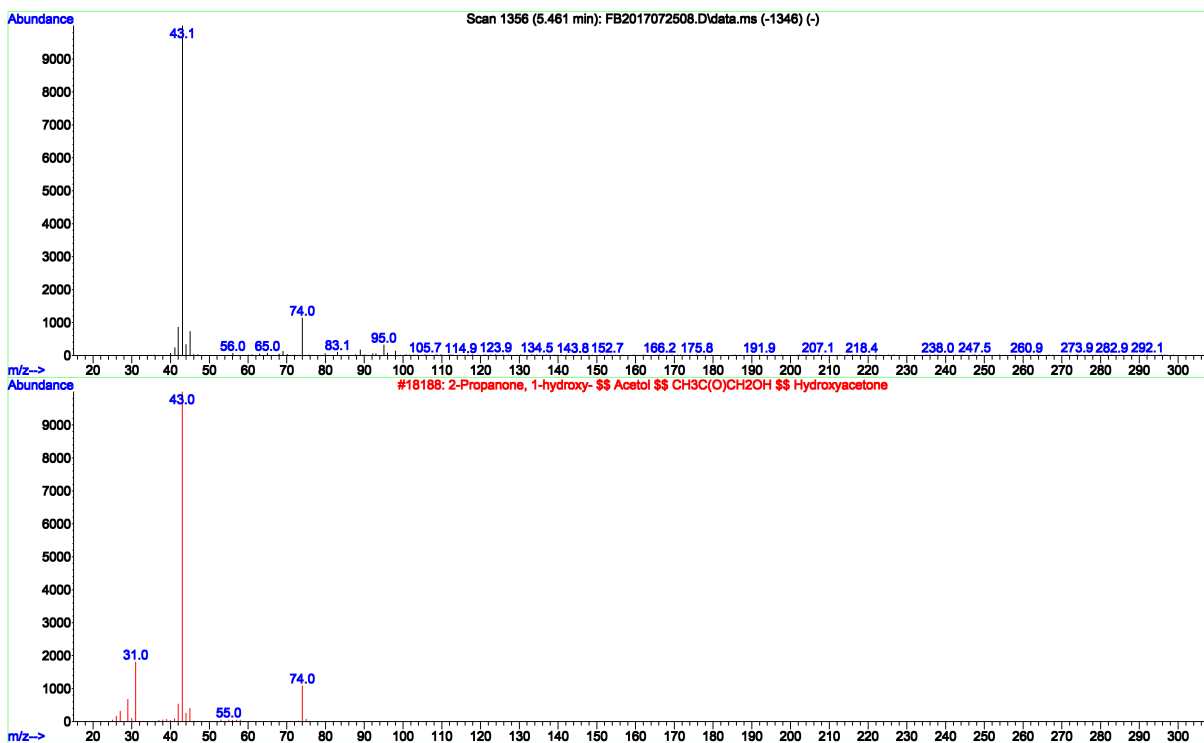

Figure S15: Mass spectrum of hydroxyacetone (top, grey) compared to NIST library mass spectrum (bottom, red).

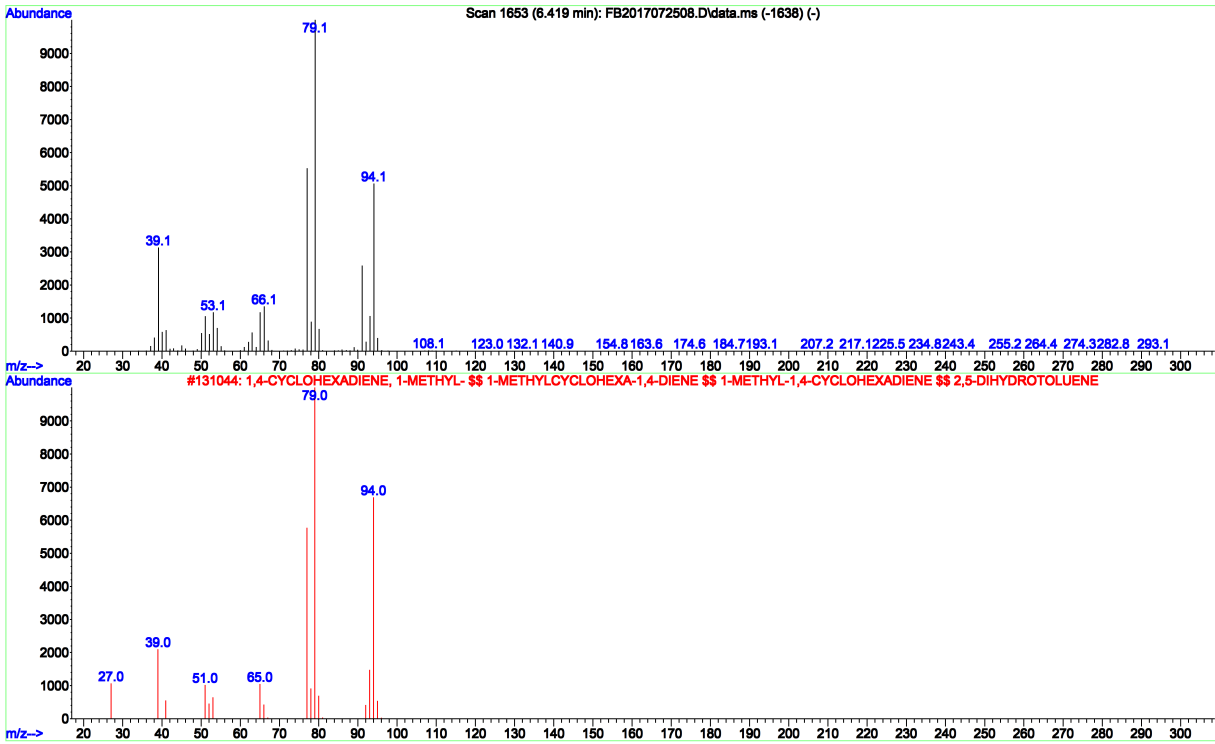

Figure S16: Mass spectrum of 1-methyl-1,4-cyclohexadiene (top, grey) compared to NIST library mass spectrum (bottom, red).

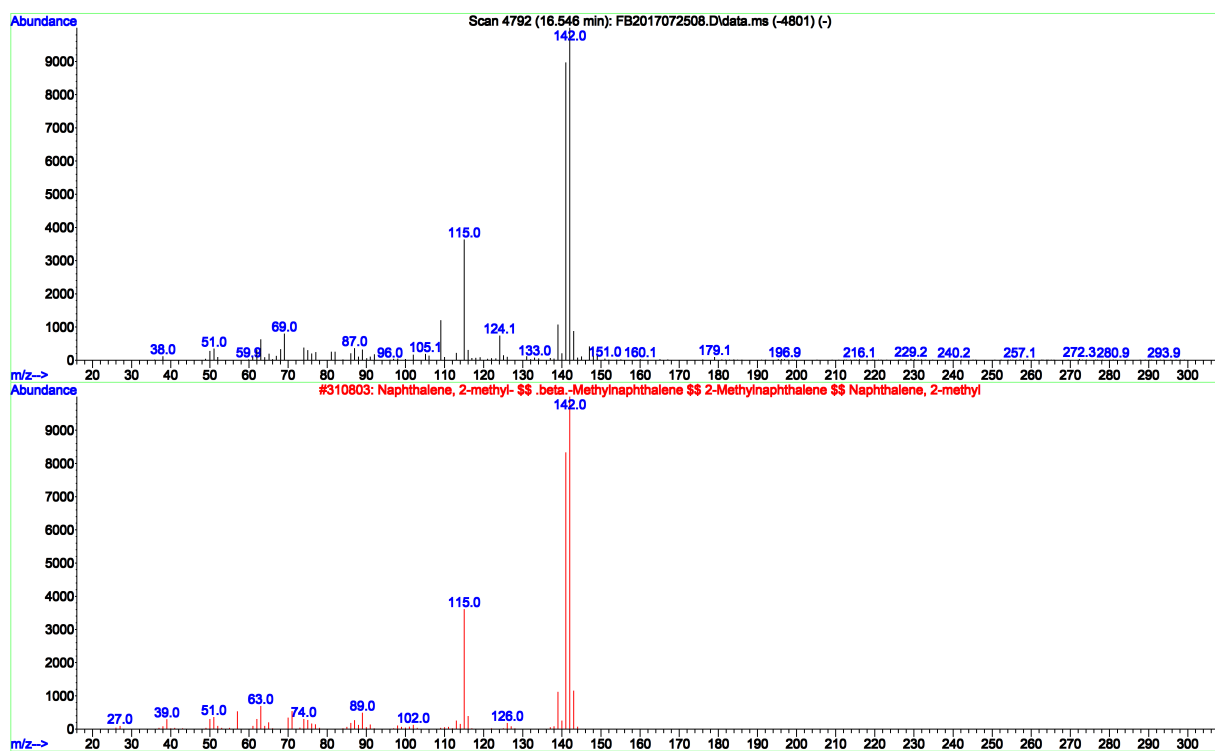

Figure S17: Mass spectrum of 2-methylnaphthalene (top, grey) compared to NIST library mass spectrum (bottom, red).
